# Supplementary material for: AcMYB10 Involved in Anthocyanin Regulation of ‘Hongyang’ Kiwifruit Induced via Fruit Bagging and High-Postharvest-Temperature Treatments
Source: MDPI journal article supplement (doi:10.3390/genes15010097), 2024-01-14
Supplement: s1 [file s1]

**Table S1.** Primer sequences used in this study

| Experiment       | Genes                   | Forward (5'-3')            | Reverse (5'-3')                | References                                                                                                                                                                                                                                             |
|------------------|-------------------------|----------------------------|--------------------------------|--------------------------------------------------------------------------------------------------------------------------------------------------------------------------------------------------------------------------------------------------------|
| qRT-PCR          | AcActin<br>(Achn107181) | TGAGAGATTCCGTTGCCAGAAGT    | TTCCTTACTCATGCGGTCTGCGAT       | Petriccione, M. et al. Reference gene selection for normalization of RT-qPCR gene expression data from <i>Actinidia deliciosa</i> leaves infected with <i>Pseudomonas syringae</i> pv. <i>actinidiae</i> . <i>Scientific Reports</i> , 2015, 5, 16961. |
|                  | AcHY5                   | ATGAGATCAGGAGAGTGCCG       | AATCTCTTGAGCCGCTTGTG           | Kim, S. et al. High ambient temperature represses anthocyanin biosynthesis through degradation of HY5. <i>Frontiers in Plant Science</i> , 2017, 8,1787                                                                                                |
|                  | AcCHS                   | ACAGCTTGACCACCTAAATGGGCTTA | CAAAGTGGAATAAAGCATGGCCAAT      | Peng Y. et al. Differential regulation of the anthocyanin profile in purple kiwifruit ( <i>Actinidia</i> species). <i>Horticulture Research</i> , 2019, 6(1): 3.                                                                                       |
|                  | AcCHI                   | GGAGGAGTTGACGGAATCCGTTG    | AACTTTTCGACGGCTTTGGCCT         |                                                                                                                                                                                                                                                        |
|                  | AcF3H                   | TGTACCCGCTCGCGATCCAG       | ATTGCGTCTCTTTCGCAAGTTTCTTG     |                                                                                                                                                                                                                                                        |
|                  | AcF3'H                  | GGTGGCGTATGCTCCGGAAGA      | GTGGCCCGCACTCACCAGTG           |                                                                                                                                                                                                                                                        |
|                  | AcDFR                   | GTCGGAGAAGCTGATTGGGATGGG   | TGGCATTTCATTGGGAGGGGT          |                                                                                                                                                                                                                                                        |
|                  | AcLDOX                  | AACAGTGGTCGGAAGTAGGG       | TCCTCCGAAACCAAGTCCTC           |                                                                                                                                                                                                                                                        |
|                  | AcF3GT                  | TAGCCAAGCAGAGATCCGCTTCC    | CAAGAATCCTTCTGGTAAGTACTGTTTCGA |                                                                                                                                                                                                                                                        |
|                  | AcbHLH42                | AAGGGGAAGGCGGTGGATTCCG     | GCACTGCAGCTCAACCAACG           |                                                                                                                                                                                                                                                        |
|                  | AcCAO                   | ATCCGTTGGCACCTTGAA         | GCGGCCCTCGTTTATTG              |                                                                                                                                                                                                                                                        |
|                  | AcRBCS                  | GTTACATGGGCCAAGAAAAC       | TCAAACCTCAAGGCAAGGGAT          |                                                                                                                                                                                                                                                        |
|                  | AcCBR                   | ATCGGATTCAAGTTATCAGGTG     | GTTCGTCCCAGCATTGTTTAT          |                                                                                                                                                                                                                                                        |
|                  | AcGLUTR                 | CCGTTCCACGATCAAGA          | TGTCACCTCCGTCACATCTAAG         |                                                                                                                                                                                                                                                        |
|                  | AcPPH                   | TGGAGGTGCTGTGGGATGA        | CAAAAGATGTTGCTGGATTGG          |                                                                                                                                                                                                                                                        |
|                  | AcPAO                   | TCCCGACCCCATTC             | TCAAAGGCGTCAGGCAAC             |                                                                                                                                                                                                                                                        |
|                  | AcSGR                   | ACAAGCGACTGTGAGATGCC       | GGTTTAGGGTTTGGTTTTGG           |                                                                                                                                                                                                                                                        |
| CDS cloning      | <i>AcBHLH42</i>         | ATGGCGGCTCCCCCTA           | TAGGGTATGATTTGGTGTATT          | Wang L. et al. A MYB/bHLH complex regulates tissue-specific anthocyanin biosynthesis in the inner pericarp of red-centered kiwifruit <i>Actinidia chinensis</i> cv. <i>Hongyang</i> . <i>the Plant Journal</i> , 2019, 99: 359-378.                    |
|                  | <i>AcMYB10</i>          | TAATAATCACTTGGTGTAGTGTAGG  | GCAGACTCAACTCCATCTAATATTT      | Peng Y. et al. Differential regulation of the anthocyanin profile in purple kiwifruit ( <i>Actinidia</i> species). <i>Horticulture Research</i> , 2019, 6(1): 3.                                                                                       |
| Promoter cloning | <i>ProAcF3GT</i>        | CTTGGACGAACCAGTGAG         | AATGTACCGACAAGGAGC             | Yu, M. et al. Light-and temperature-induced expression of an R2R3-MYB gene regulates anthocyanin biosynthesis in red-fleshed kiwifruit. <i>International Journal of Molecular Sciences</i> , 2019, 20, 5228.                                           |
|                  | <i>ProAcLDOX</i>        | GGGCATGATGGTTGGTTA         | TACAGACGGAAGGCGACA             |                                                                                                                                                                                                                                                        |

>pAcF3GT-1058  
 TGGACGAACCAGTGAGTACATATATATACATGTATATGGAGGAAGAGAATAGTTTAATTTAGAAACA  
 AGTTAAATACAGAATATTTTAATAAAGTAGAGAAAAATAGAGAGTATTGTTGGATAACGTGTTTAAAA  
 AGTAATTTCTTATAAATAGGGAATGTACTTTTTGATAAAATTTAATAAAGAATGAGGTTTATTGTTG  
 AAGATGCTCTAATCATGTACTTTGGGTATGTTTGAACATTAAGTTTAGTTTCATGGAAGGGGAAAAAT  
 TGCTGAATTAAGGTTTGCTAGAAAAGTGGGCATGAGTCAAAGCTTTTGGGGGGATGGGGAT  
 TTAGTAGCAAATGCTATGTTTGAATCAGCTTATTAGATTAGTAAATTTTTTAAAAATCCTTTAAGTTA  
 AAAAAAAAAAAGGAAAAATCAATGCTGTATAGTAAAAAGGTAAGATGCTTAAACCAAAATTTGTTGGG  
 AATATTTGTATTTGTGCTTTTTTTTTTTAACGAATTACTACTTTGCCTGTTAGGCAATGTTCTTCAATTT  
 TTGAAAAATAATTTTTTAAAGCGAGGCATTTTTTCATCTTAGTCATCCTTAGTCATATGGATAAATAAG  
 TTGTTTAACGGATGGAGCAAATCCGAAATATTGTCACAAACAAAGTAGACCTTTTCTGTTGGCTTAC  
 AATCCAAAAAGCAAACAAGGCCTAAACTTTGTTAGAGCTGCACAATGCAAACACACAGTTACAAGCT  
 GACTTGTGTAGTCGAAGACATGCGAACCCTTAACCTTTCTCAAATACACAACCTTAATCAAGT  
 ACACAAGCCACGGGCCAACCCTTCTCTCTCTCTCATACCTTATAAAACAGCTTTTCTTACATTC  
 ATTTGATATATCACTTTTCTTAGTACTAGCCTCTGAGCTTTGTTGGACTTTTATAGGTCTTTAACTCT  
 TTTTCAGTCAACCAAGCCAAGCCAAGCCTAGCCTAGCCACCAAAATTCGCTGAAAACACCACAAG  
 CTAGACCCAAAATCAAAGCCTTAAAAAACCATG

> pAcLDOX-1500  
 TGATAGTCCAGTTTTTAGGTAAATTTACCAATGGTCCCTGTAGTTATACCAAAGTTTCACTTTGGTCC  
 TTATATTTTCAATTTAAACAATGACAACCCTATAATTTAATTTAGTTATAACGTAGTCTCTCCGTCCA  
 TGCTTTTTAAATTTTGGATGGAAAAGTGAGCATGCAAGCTCATGTAAACCTCTTTAAAGGTAATTAT  
 ACAACCATTAGTCCAGTAGTTTGGCCAAAGTTTCACTTTGGTCTTATAAATGCCACTTGAGTTTTTA  
 CATGTTTTTGTTCATCGAAATTGTTGATGGGTATTGACAGATGAATTATTTAAACTAAGTTAAAC  
 TTCAGAATCCTAATTGTTCAAATAAAATTATAGTTACTTAAGTGAAATTTTTGTCAGATTAGAGGGAC  
 TAATGGTGAACTTACCCTTGAAAATTCAAATTAGGATGGGATTGAACATGAGGAAAAGAGAAG  
 TGAATGGTAGACATGACTACATGAGTAATTGAAAGTCTTAATTATTCCAACAGTCCTAACATTTCTTG  
 CTAATTTAAGCTAATGTACCACAATTTCTCATCTTTGAAATCGAACAAATTCAAGTCGTTTTCTTT  
 TTCTTATACCTTTTTTCCCCACAAAACCGAACATAAAAAATTTCAACGGTAACAGTAAGACTCAGATTC  
 AAAAGTCGTGCTCAAGAAGAGAGTGACGCTCACTTAGAGACTATTGATATTGAACATTTGGTATT  
 TGGTCTTTTACGTAAAAATGTGGTTGATAGATATCGATTGAGTCGTGATTGTTGTGAGGTACGTGAAC  
 AAATATTAAGTGTAACGATGATACTATTTACGTGGTATTGGTATCACTAGCCAATAAAAATTAATGAA  
 ATTTCCGGCTAACCAATGATATGTTATTGTGAATACCGCAAAATAAAATTTATCATTATTCAGTTACT  
 ACCAATATACCAACTAGCTAAAATTGGGGAATATGCAATGAGTGGGCAAGCAATGGAAATAGTAA  
 AAAAAATTAATAATTTTGAAGTTGATCTATGAAAAAAACAGAAAGTGGAATGTATAACGGTTGAGAT  
 CATGTAAAAAATTAATTTTACCTTACAATTAATTTAGAAAGTTTTTACGAACCAATTATAGTTGATTG  
 ACAATAATGATAATTTAATTAAGAACAAGAAAAAGTGTAAGGGTGACATTGGATCTCTATCTCACGA  
 CGGTTAGACCACCTCGTGCTTGTGCCATCCAGTCAAGTCCACTCCCCACGTGAGAACTGATTCAA  
 ACCACTCTCTCACTTTTAAGTTGTTAGCTAGCCCTAACCCCTCACCAGTCAGCACCTTCTGAAAAA  
 ACCAACACATTGCATAGTTGAAGCAACAAAAACCTCTATAAACTCCCAAAACCCTAATCACAACT  
 CACATAATTGTCACAAATTCACACATAAGTACCGAATTACATTATAATTTAGGTGTCGAAAAAATG

**Figure S1.** The promoter sequences of *AcF3GT* and *AcLDOX*  
 Note: cis-acting elements are indicated in green.

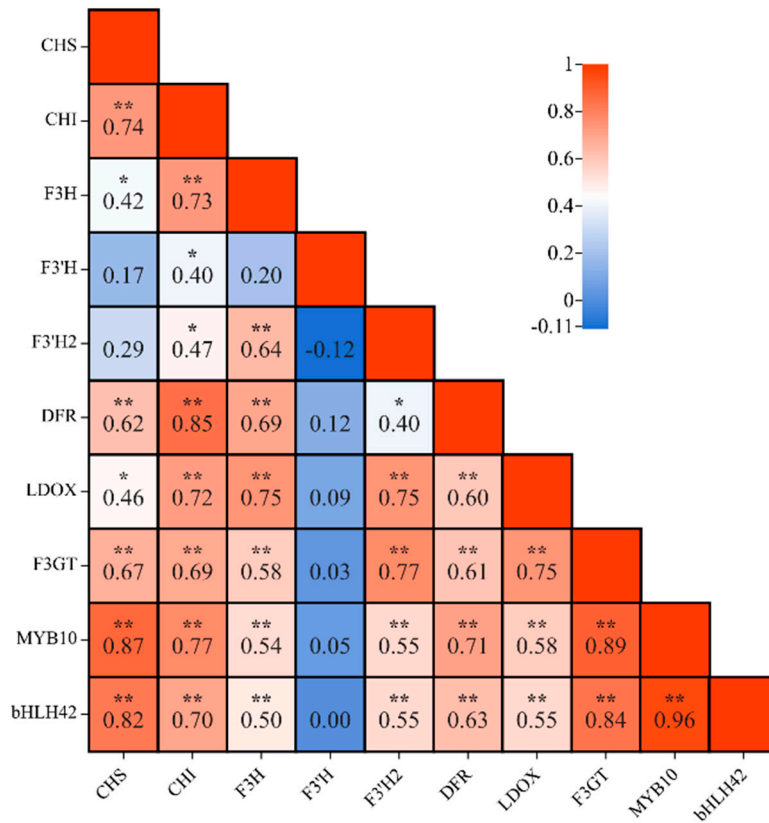

**Figure S2.** Correlation analysis of gene expression between anthocyanin synthesis genes and regulatory genes.

Note: \* and \*\* represent statistical significance at  $p \leq 0.05$  and  $p \leq 0.01$  levels, respectively.

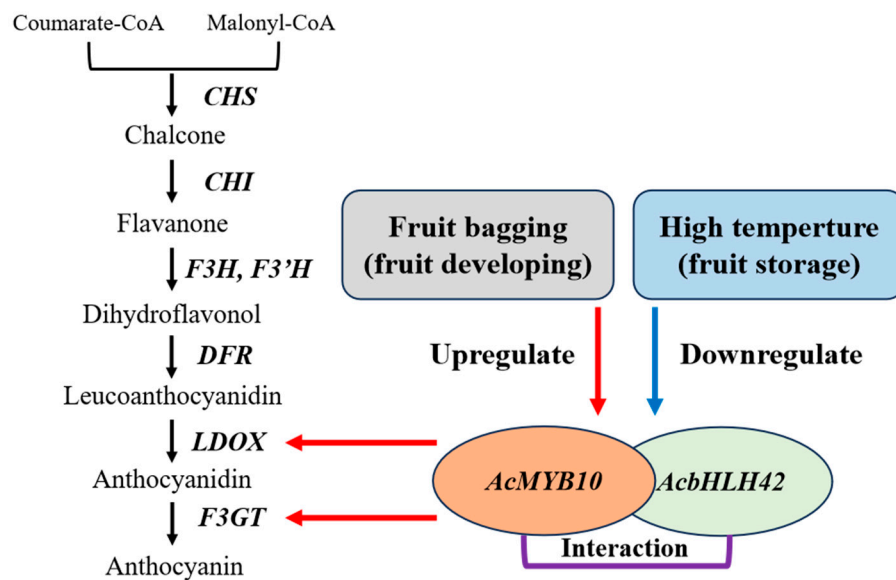

**Figure S3.** Regulation model of anthocyanin accumulation pathway in bagging and storage of kiwifruit.
